# Supplementary material
Source: publisher site journal article supplement (https://www.dovepress.com/article/594176)
Supplement: Supplementary file 1 [file 594176%20Revised%20Supplementary.docx]

**Supplementary Figure S1. The METIMMOX trial schedule.**

The treatment schedule consisted of intermittent periods of eight cycles. FLOX: oxaliplatin 85 mg/m2 day 1 and bolus 5-fluorouracil 500 mg/m2 and folinic acid 100 mg days 1-2. Nivolumab: 240 mg flat dose. During a break period, radiographic assessment (CT) and visits were done every 8 weeks until disease progression and the treatment was reintroduced in a new sequence. Treatment sequences were continued until disease progression on ongoing therapy (progressive disease), an intolerable adverse event, consent withdrawal, or death, whichever occurred first. CEA, carcinoembryonic antigen.

**Supplementary Figure S2. CONSORT diagram of the METIMMOX subjects.**

The trial enrolled 40 control-arm patients and 40 experimental-arm patients. Four cases were screening failures or withdrew the informed consent before the first FLOX cycle was administered, leaving 76 intention-to-treat patients randomly allocated between the study arms. Of these, 71 patients (*n* = 35, control arm; *n* = 36, experimental arm) had evaluable carcinoembryonic antigen (CEA) kinetics in the first treatment sequence.

|  | Control arm  (*n* = 35) | Experimental arm  (*n* = 36) |
| --- | --- | --- |
| Age, years | 66 (38-79) | 60.5 (43-80) |
| Sex  Female  Male | 14 (40)  21 (60) | 18 (50)  18 (50) |
| Body Mass Index, kg/m2 | 25.3 (20.4-40.2) | 26.3 (17.6-36.6) |
| ECOG status  0  1 | 19 (54)  16 (46) | 22 (61)  14 (39) |
| Primary tumor *in situ*  No  Yes | 20 (57)  15 (43) | 16 (44)  20 (56) |
| Primary tumor sidedness  Right  Left, including rectum | 9 (26)  26 (74) | 10 (28)  26 (72) |
| Tumor mutational status  Wildtype  *KRAS*  *NRAS*  *BRAF* | 9 (26)  15 (43)  4 (11)  7 (20) | 12 (33)  21 (58)  0 (0)  3 (8) |
| Liver metastasis  No  Yes | 3 (9)  32 (91) | 7 (19)  29 (81) |
| Number of metastatic sites  ≥2  <2 | 19 (54)  16 (46) | 23 (64)  13 (36) |
| Baseline CEA level  Normal, <5.0 μg/L  Elevated, ≥5.0 μg/L | 5 (14)  30 (86) | 8 (22)  28 (78) |
| CEA kinetics group  Non-responding  Stable/Responding  Flare | 8 (23)  17 (49)  10 (29) | 9 (25)  21 (58)  6 (17) |

**Supplementary Table S1. Clinical characteristics of the study cohort.**

Data are given as median (minimum-maximum) or absolute number (%).

CEA, carcinoembryonic antigen; ECOG, Eastern Cooperative Oncology Group.

|  | CEA Non-responding  (*n* = 17) | CEA Stable/Responding  (*n* = 38) | CEA  Flare  (*n* = 16) |
| --- | --- | --- | --- |
| Age, years | 65 (46-80) | 61.5 (38-79) | 71 (58-78) |
| Sex  Female  Male | 6 (35)  11 (65) | 19 (50)  19 (50) | 7 (44)  9 (56) |
| Primary tumor *in situ*  No  Yes | 8 (47)  9 (53) | 19 (50)  19 (50) | 8 (50)  8 (50) |
| Primary tumor sidedness  Right  Left, including rectum | 6 (35)  11 (65) | 7 (18)  31 (82) | 6 (38)  10 (63) |
| Tumor mutational status  Wildtype  *KRAS*  *NRAS*  *BRAF* | 4 (24)  8 (47)  1 (6)  4 (25) | 14 (37)  21 (55)  1 (3)  2 (5) | 3 (19)  7 (44)  2 (13)  4 (25) |
| Liver metastasis  No  Yes | 2 (12)  15 (88) | 6 (16)  32 (84) | 2 (13)  14 (88) |
| Number of metastatic sites  ≥2  <2 | 8 (47)  9 (53) | 23 (61)  15 (40) | 11 (69)  5 (31) |
| BOR; control arm  Did not reach radiologic evaluation  PD/SD  PR/CR* | 1 (13)  4 (50)  3 (38) | 3 (18)  3 (18)  11 (65) | 0 (0)  4 (40)  6 (60) |
| BOR; experimental arm  Did not reach radiologic evaluation  PD/SD  PR/CR | 0 (0)  9 (100)  0 (0) | 0 (0)  8 (38)  13 (62) | 0 (0)  2 (33)  4 (67) |

**Supplementary Table S2. Characteristics of the carcinoembryonic antigen (CEA) kinetics groups.**

Data are given as median (minimum-maximum) or absolute number (%).

* None of control-arm patients experienced CR.

BOR, best overall response; CR, complete response; PD, progressive disease; PR, partial response; SD, stable disease.

**Supplementary Figure S3. Time until flare of the serum carcinoembryonic antigen level.**

Boxes: Minimum to maximum and 5-95% percentiles. Vertical lines: Median values.
